# Supplementary material for: Improving RNA-Seq expression estimates by correcting for fragment bias
Source: Genome Biol. 2011 Mar 16;12(3):R22. doi: 10.1186/gb-2011-12-3-r22 (PMC3129672; doi:10.1186/gb-2011-12-3-r22)
Supplement: Additional file 2 — Raw expression data. Raw expression estimates used in comparisons, including the NanoString expression measurements. [file gb-2011-12-3-r22-S2.TGZ]

Archive with 10 entries (9 files):
- supp_data
- supp_data/._maqc-hbr.csv
- supp_data/maqc-hbr.csv
- supp_data/._maqc-uhr.csv
- supp_data/maqc-uhr.csv
- supp_data/NanoString_data-bias.xlsx
- supp_data/._SRA001149.csv
- supp_data/SRA001149.csv
- supp_data/._SRA020818.csv
- supp_data/SRA020818.csv
