# Supplementary material for: Improving RNA-Seq expression estimates by correcting for fragment bias
Source: Genome Biol. 2011 Mar 16;12(3):R22. doi: 10.1186/gb-2011-12-3-r22 (PMC3129672; doi:10.1186/gb-2011-12-3-r22)
Supplement: Additional file 2 — Raw expression data. Raw expression estimates used in comparisons, including the NanoString expression measurements. [file gb-2011-12-3-r22-S2.TGZ › supp_data/NanoString_data-bias.xlsx]

## Sheet: RCC Collection
File Attributes
File name			20100810_donaghey8-10_01_01	20100810_donaghey8-10_01_02	20100810_donaghey8-10_01_03	20100810_donaghey8-10_01_04	20100810_donaghey8-10_01_05	20100810_donaghey8-10_01_06	20100810_donaghey8-10_01_07	20100810_donaghey8-10_01_08	20100810_donaghey8-10_01_09	20100810_donaghey8-10_01_10	20100810_donaghey8-10_01_11
Sample ID			1	1	1	1	1	1	1	1	1	1	1
Owner
Sample Date			2010-03-17	2010-03-17	2010-03-17	2010-03-17	2010-03-17	2010-03-17	2010-03-17	2010-03-17	2010-03-17	2010-03-17	2010-03-17
File Version			1.6	1.6	1.6	1.6	1.6	1.6	1.6	1.6	1.6	1.6	1.6
GeneRLF			mESLinc_C482	mESLinc_C482	mESLinc_C482	mESLinc_C482	mESLinc_C482	mESLinc_C482	mESLinc_C482	mESLinc_C482	mESLinc_C482	mESLinc_C482	mESLinc_C482
Comments
Lane Attributes
Lane ID			1	2	3	4	5	6	7	8	9	10	11
FOV Count			1155	1155	1155	1155	1155	1155	1155	1155	1155	1155	1155
FOV Counted			1124	1130	1144	1140	1142	1138	1143	1142	1141	1145	1141
Scanner ID			DA40	DA40	DA40	DA40	DA40	DA40	DA40	DA40	DA40	DA40	DA40
StagePosition			1	1	1	1	1	1	1	1	1	1	1
Binding Density			0.23	0.28	0.28	0.32	0.27	0.25	0.23	0.25	1.46	1.49	1.4
Messages
Reporter Counts
Code Class	Name	Accession
Positive	POS_A(128)	ERCC_00117.1	29260	35912	31679	33215	31529	31232	27796	32884	22720	22293	21283
Positive	POS_B(32)	ERCC_00112.1	8767	10973	9481	10647	9713	9449	8221	10072	6743	6557	6370
Positive	POS_C(8)	ERCC_00002.1	2492	3000	2674	2927	2479	2643	2309	2797	1913	1940	1802
Positive	POS_D(2)	ERCC_00092.1	684	826	658	717	809	782	650	823	502	513	471
Positive	POS_E(0.5)	ERCC_00035.1	258	344	265	255	272	234	262	254	190	193	174
Positive	POS_F(0.125)	ERCC_00034.1	116	171	137	125	131	131	130	152	125	112	121
Negative	NEG_A(0)	ERCC_00096.1	10	14	16	12	9	18	17	15	18	5	14
Negative	NEG_B(0)	ERCC_00041.1	22	25	25	33	21	27	28	21	35	32	31
Negative	NEG_C(0)	ERCC_00019.1	42	43	27	23	34	28	41	63	38	32	22
Negative	NEG_D(0)	ERCC_00076.1	41	42	25	22	37	43	46	42	32	35	31
Negative	NEG_E(0)	ERCC_00098.1	18	30	37	18	36	27	29	38	22	22	24
Negative	NEG_F(0)	ERCC_00126.1	28	25	15	24	26	25	34	35	19	19	20
Negative	NEG_G(0)	ERCC_00144.1	58	62	42	52	49	68	59	62	36	35	22
Negative	NEG_H(0)	ERCC_00154.1	109	89	62	69	94	105	124	130	60	45	49
											mES	mES	mES
Endogenous	2510048L02Rik	NM_025977.2									90	94	70
Endogenous	2610524G07Rik	NM_025596.5									10828	10681	10043
Endogenous	4933434E20Rik	NM_027500.3									57	73	100
Endogenous	5830415L20Rik	NM_001042501.1									1154	1146	1136
Endogenous	6030458C11Rik	NM_001166360.1									603	521	566
Endogenous	Adar	NM_001038587.3									602	566	528
Endogenous	AIR_1	AIR_1.1									27	30	30
Endogenous	Ard1	NM_019870.2									2829	2894	2759
Endogenous	Armcx2	NM_026139.3									367	338	302
Endogenous	Atp1b2	NM_013415.5									378	371	345
Endogenous	AU022252	NM_001012400.1									1089	1124	1079
Endogenous	AW495713	NM_001042650.1									171	178	132
Endogenous	Becn1	NM_019584.3									2032	2016	1904
Endogenous	Bhlhb9	NM_001098222.1									622	626	628
Endogenous	Brp16	NM_021555.1									488	475	448
Endogenous	C230021P08Rik	NM_001001884.1									53	53	50
Endogenous	Cbx2	NM_007623.2									617	633	612
Endogenous	Ccdc75	NM_181649.6									531	485	468
Endogenous	Cct8	NM_009840.3									10640	10626	10261
Endogenous	Cdv3	NM_175833.2									9218	9075	8834
Endogenous	Cecr2	NM_001128151.1									776	750	729
Endogenous	Cep152	NM_001081091.1									488	499	571
Endogenous	Chchd1	NM_025366.2									1825	1920	1825
Endogenous	Cnbp	NM_001109746.1									157	155	145
Endogenous	Crem	NM_001110853.1									96	77	100
Endogenous	Crls1	NM_025646.3									1826	1730	1665
Endogenous	Csnk1d	NM_139059.2									1719	1635	1617
Endogenous	Cyb5r1	NM_028057.2									1843	1714	1719
Endogenous	D10Ertd641e	NM_025514.2									395	394	369
Endogenous	Dclre1c	NM_146114.3									96	88	68
Endogenous	Dedd2	NM_207677.3									420	428	368
Endogenous	Diap2	NM_172493.1									482	503	484
Endogenous	Dnajc24	NM_026992.2									43	44	33
Endogenous	Dppa4	NM_001018002.1									5226	5182	4797
Endogenous	E130308A19Rik	NM_001015681.1									865	916	852
Endogenous	Eif2ak3	NM_010121.2									496	456	449
Endogenous	Eif5a	NM_181582.3									20614	20302	19356
Endogenous	Emp1	NM_010128.4									353	325	327
Endogenous	Epdr1	NM_134065.3									376	369	340
Endogenous	F2r	NM_010169.2									449	481	465
Endogenous	Fam18b	NM_026210.4									1565	1488	1436
Endogenous	Fth1	NM_010239.1									31745	32167	30577
Endogenous	Gcdh	NM_008097.2									1655	1663	1534
Endogenous	Gdpd1	NM_025638.1									175	158	176
Endogenous	Gm1564	NM_001127576.1									475	502	490
Endogenous	Gpr160	NM_001134386.1									191	176	145
Endogenous	Gprc5c	NM_001110337.1									77	73	74
Endogenous	hHOTAIR-1a	hHOTAIR_1.1									13	18	12
Endogenous	hHOTAIR-1b	hHOTAIR_1.1									50	70	63
Endogenous	hHOTAIR-1c	hHOTAIR_1.1									19	10	18
Endogenous	Hisppd2a	NM_178795.4									171	184	175
Endogenous	Hnrpa2b1	NM_016806.2									731	695	625
Endogenous	HOTAIR_1	HOTAIR_1.1									34	28	16
Endogenous	KCNQ1_1	KCNQ1_1.1									107	113	93
Endogenous	Kdelc1	NM_023645.3									1306	1289	1271
Endogenous	lincP21_1	lincP21_1.1									533	552	538
Endogenous	Lrfn3	NM_175478.2									302	295	289
Endogenous	Map1lc3a	NM_025735.1									527	502	477
Endogenous	Mll3	NM_001081383.1									329	383	378
Endogenous	Mtap7	NM_008635.2									646	577	598
Endogenous	Myo10	NM_019472.2									1702	1688	1647
Endogenous	Nanog	NM_028016.2									26738	26491	25591
Endogenous	Ncoa2	NM_008678.2									456	502	475
Endogenous	Ndg2	NM_175329.3									2920	2874	2697
Endogenous	NEAT1_1	NEAT1_1.1									32420	32765	31379
Endogenous	NM_001003899_intron	NM_001003899_intron.1									329	326	334
Endogenous	NM_001009935_intron	NM_001009935_intron.1									307	341	298
Endogenous	NM_001018002_intron	NM_001018002_intron.1									88	99	89
Endogenous	NM_001035123_intron	NM_001035123_intron.1									339	347	322
Endogenous	NM_001161737_intron	NM_001161737_intron.1									50	38	35
Endogenous	NM_001163478_intron	NM_001163478_intron.1									2929	2930	2819
Endogenous	NM_008097_intron	NM_008097_intron.1									91	89	62
Endogenous	NM_008945_intron	NM_008945_intron.1									69	70	64
Endogenous	NM_009079_intron	NM_009079_intron.1									195	192	194
Endogenous	NM_009279_intron	NM_009279_intron.1									53	59	70
Endogenous	NM_009556_intron	NM_009556_intron.1									672	695	596
Endogenous	NM_010239_intron	NM_010239_intron.1									89	81	65
Endogenous	NM_013633_intron	NM_013633_intron.1									80	69	64
Endogenous	NM_016806_intron	NM_016806_intron.1									102	124	109
Endogenous	NM_025366_intron	NM_025366_intron.1									210	208	207
Endogenous	NM_025596_intron	NM_025596_intron.1									155	177	145
Endogenous	NM_028057_intron	NM_028057_intron.1									497	500	499
Endogenous	NM_175329_intron	NM_175329_intron.1									160	167	135
Endogenous	NM_175833_intron	NM_175833_intron.1									412	402	410
Endogenous	NM_181582_intron	NM_181582_intron.1									90	102	99
Endogenous	Nmnat2	NM_175460.3									70	79	77
Endogenous	OTTMUSG00000010431	NM_001085539.1									2469	2570	2415
Endogenous	Ovol2	NM_152947.2									254	274	271
Endogenous	Paip1	NM_001079849.1									32	33	39
Endogenous	Peci	NM_001110331.1									978	1000	986
Endogenous	Pfkfb1	NM_008824.2									416	393	423
Endogenous	Pou5f1	NM_013633.2									37079	37069	35266
Endogenous	Prg4	NM_021400.3									29	26	17
Endogenous	Prkag2	NM_145401.1									47	35	37
Endogenous	Prss36	NM_001081374.1									155	142	158
Endogenous	Psmb4	NM_008945.2									11012	10908	10337
Endogenous	Ptplad2	NM_025760.3									117	95	101
Endogenous	Rab3gap1	NM_178690.4									764	794	741
Endogenous	Rab7l1	NM_144875.1									472	494	493
Endogenous	Rabggtb-2	NM_001163478.1									6000	5990	5780
Endogenous	Rabggtb-3	NM_001163479.1									4261	4254	4102
Endogenous	Ralgps2	NM_001159965.1									186	183	188
Endogenous	Rnase4	NM_021472.3									108	141	130
Endogenous	Ror2	NM_013846.3									326	320	379
Endogenous	Rtn3	NM_001003933.1									988	971	982
Endogenous	Rusc2	NM_001037709.1									158	143	125
Endogenous	Setd6	NM_001035123.3									1007	1025	960
Endogenous	Siva1	NM_001161737.1									5970	5741	5577
Endogenous	Slc25a10	NM_013770.1									220	207	222
Endogenous	Slc30a9	NM_178651.3									356	413	392
Endogenous	Slmap	NM_032008.3									2897	2870	2716
Endogenous	Ssr4	NM_009279.2									3466	3480	3322
Endogenous	St6galnac4	NM_011373.2									42	42	39
Endogenous	Stxbp3b	NM_001030317.2									336	293	311
Endogenous	Tardbp	NM_001003899.2									1061	1169	1085
Endogenous	Tmem205	NM_178577.4									146	132	123
Endogenous	Tmem51	NM_145402.3									1252	1207	1167
Endogenous	Tnfrsf12a	NM_001161746.1									1119	1129	1093
Endogenous	TSIX_1	TSIX_1.1									203	195	213
Endogenous	Txnip	NM_001009935.2									4418	4419	4136
Endogenous	Vangl1	NM_177545.4									894	878	813
Endogenous	Vezt	NM_172538.4									519	523	495
Endogenous	XIST_1	XIST_1.1									23	20	23
Endogenous	Zc3h10	NM_134003.1									495	459	419
Endogenous	Zfp42	NM_009556.3									23869	23595	22954
Endogenous	Zyg11bl	NM_178694.3									212	250	206

## Sheet: Reporter Order
			nCounter RCC Collector Worksheet								© 2009 NanoString Technologies	v1.6.0
Name	Rank
POS_A(128)	100
POS_A(100)	101
POS_A(50)	102
POS_A(32)	103
POS_A(25)	104
POS_A(10)	105
POS_A(8)	106
POS_A(5)	107
POS_A(2.5)	108
POS_A(2)	109
POS_A(1)	110
POS_A(0.5)	111
POS_A(0.25)	112
POS_A(0.125)	113
POS_A(0.1)	114
POS_B(128)	115
POS_B(100)	116
POS_B(50)	117
POS_B(32)	118
POS_B(25)	119
POS_B(10)	120
POS_B(8)	121
POS_B(5)	122
POS_B(2.5)	123
POS_B(2)	124
POS_B(1)	125
POS_B(0.5)	126
POS_B(0.25)	127
POS_B(0.125)	128
POS_B(0.1)	129
POS_C(128)	130
POS_C(100)	131
POS_C(50)	132
POS_C(32)	133
POS_C(25)	134
POS_C(10)	135
POS_C(8)	136
POS_C(5)	137
POS_C(2.5)	138
POS_C(2)	139
POS_C(1)	140
POS_C(0.5)	141
POS_C(0.25)	142
POS_C(0.125)	143
POS_C(0.1)	144
POS_D(128)	145
POS_D(100)	146
POS_D(50)	147
POS_D(32)	148
POS_D(25)	149
POS_D(10)	150
POS_D(8)	151
POS_D(5)	152
POS_D(2.5)	153
POS_D(2)	154
POS_D(1)	155
POS_D(0.5)	156
POS_D(0.25)	157
POS_D(0.125)	158
POS_D(0.1)	159
POS_E(128)	160
POS_E(100)	161
POS_E(50)	162
POS_E(32)	163
POS_E(25)	164
POS_E(10)	165
POS_E(8)	166
POS_E(5)	167
POS_E(2.5)	168
POS_E(2)	169
POS_E(1)	170
POS_E(0.5)	171
POS_E(0.25)	172
POS_E(0.125)	173
POS_E(0.1)	174
POS_F(128)	175
POS_F(100)	176
POS_F(50)	177
POS_F(32)	178
POS_F(25)	179
POS_F(10)	180
POS_F(8)	181
POS_F(5)	182
POS_F(2.5)	183
POS_F(2)	184
POS_F(1)	185
POS_F(0.5)	186
POS_F(0.25)	187
POS_F(0.125)	188
POS_F(0.1)	189
POS_G(128)	190
POS_G(100)	191
POS_G(50)	192
POS_G(32)	193
POS_G(25)	194
POS_G(10)	195
POS_G(8)	196
POS_G(5)	197
POS_G(2.5)	198
POS_G(2)	199
POS_G(1)	200
POS_G(0.5)	201
POS_G(0.25)	202
POS_G(0.125)	203
POS_G(0.1)	204
POS_H(128)	205
POS_H(100)	206
POS_H(50)	207
POS_H(32)	208
POS_H(25)	209
POS_H(10)	210
POS_H(8)	211
POS_H(5)	212
POS_H(2.5)	213
POS_H(2)	214
POS_H(1)	215
POS_H(0.5)	216
POS_H(0.25)	217
POS_H(0.125)	218
POS_H(0.1)	219
POS_I(128)	220
POS_I(100)	221
POS_I(50)	222
POS_I(32)	223
POS_I(25)	224
POS_I(10)	225
POS_I(8)	226
POS_I(5)	227
POS_I(2.5)	228
POS_I(2)	229
POS_I(1)	230
POS_I(0.5)	231
POS_I(0.25)	232
POS_I(0.125)	233
POS_I(0.1)	234
POS_J(128)	235
POS_J(100)	236
POS_J(50)	237
POS_J(32)	238
POS_J(25)	239
POS_J(10)	240
POS_J(8)	241
POS_J(5)	242
POS_J(2.5)	243
POS_J(2)	244
POS_J(1)	245
POS_J(0.5)	246
POS_J(0.25)	247
POS_J(0.125)	248
POS_J(0.1)	249
NEG_A(0)	250
NEG_B(0)	251
NEG_C(0)	252
NEG_D(0)	253
NEG_E(0)	254
NEG_F(0)	255
NEG_G(0)	256
NEG_H(0)	257
NEG_I(0)	258

## Sheet: Normalization
											mES	mES	mES
Positive	POS_A(128)	ERCC_00117.1	29260	35912	31679	33215	31529	31232	27796	32884	22720	22293	21283
Positive	POS_B(32)	ERCC_00112.1	8767	10973	9481	10647	9713	9449	8221	10072	6743	6557	6370
Positive	POS_C(8)	ERCC_00002.1	2492	3000	2674	2927	2479	2643	2309	2797	1913	1940	1802
Positive	POS_D(2)	ERCC_00092.1	684	826	658	717	809	782	650	823	502	513	471
Positive	POS_E(0.5)	ERCC_00035.1	258	344	265	255	272	234	262	254	190	193	174
Positive	POS_F(0.125)	ERCC_00034.1	116	171	137	125	131	131	130	152	125	112	121
		SUMS	41577	51226	44894	47886	44933	44471	39368	46982	32193	31608	30221	44471	MEDIAN
		Norm Val	1.06961	0.868133	0.990578	0.928685	0.989718	1	1.12962	0.946554	1.38139	1.40695	1.47153
											mES	mES	mES
Negative	NEG_A(0)	ERCC_00096.1	10	14	16	12	9	18	17	15	18	5	14
Negative	NEG_B(0)	ERCC_00041.1	22	25	25	33	21	27	28	21	35	32	31
Negative	NEG_C(0)	ERCC_00019.1	42	43	27	23	34	28	41	63	38	32	22
Negative	NEG_D(0)	ERCC_00076.1	41	42	25	22	37	43	46	42	32	35	31
Negative	NEG_E(0)	ERCC_00098.1	18	30	37	18	36	27	29	38	22	22	24
Negative	NEG_F(0)	ERCC_00126.1	28	25	15	24	26	25	34	35	19	19	20
Negative	NEG_G(0)	ERCC_00144.1	58	62	42	52	49	68	59	62	36	35	22
Negative	NEG_H(0)	ERCC_00154.1	109	89	62	69	94	105	124	130	60	45	49
														*Normalization Factor
											mES	mES	mES		mES	mES	mES
Endogenous	2510048L02Rik	NM_025977.2									90	94	70	2510048L02Rik	124.325	132.254	103.007
Endogenous	2610524G07Rik	NM_025596.5									10828	10681	10043	2610524G07Rik	14957.7	15027.7	14778.5
Endogenous	4933434E20Rik	NM_027500.3									57	73	100	4933434E20Rik	78.7391	102.708	147.153
Endogenous	5830415L20Rik	NM_001042501.1									1154	1146	1136	5830415L20Rik	1594.12	1612.37	1671.65
Endogenous	6030458C11Rik	NM_001166360.1									603	521	566	6030458C11Rik	832.977	733.023	832.884
Endogenous	Adar	NM_001038587.3									602	566	528	Adar	831.595	796.336	776.966
Endogenous	AIR_1	AIR_1.1									27	30	30	AIR_1	37.2975	42.2086	44.1458
Endogenous	Ard1	NM_019870.2									2829	2894	2759	Ard1	3907.94	4071.72	4059.94
Endogenous	Armcx2	NM_026139.3									367	338	302	Armcx2	506.969	475.55	444.401
Endogenous	Atp1b2	NM_013415.5									378	371	345	Atp1b2	522.164	521.98	507.677
Endogenous	AU022252	NM_001012400.1									1089	1124	1079	AU022252	1504.33	1581.42	1587.78
Endogenous	AW495713	NM_001042650.1									171	178	132	AW495713	236.217	250.438	194.241
Endogenous	Becn1	NM_019584.3									2032	2016	1904	Becn1	2806.98	2836.42	2801.79
Endogenous	Bhlhb9	NM_001098222.1									622	626	628	Bhlhb9	859.223	880.753	924.119
Endogenous	Brp16	NM_021555.1									488	475	448	Brp16	674.117	668.303	659.244
Endogenous	C230021P08Rik	NM_001001884.1									53	53	50	C230021P08Rik	73.2135	74.5686	73.5763
Endogenous	Cbx2	NM_007623.2									617	633	612	Cbx2	852.316	890.602	900.574
Endogenous	Ccdc75	NM_181649.6									531	485	468	Ccdc75	733.517	682.373	688.674
Endogenous	Cct8	NM_009840.3									10640	10626	10261	Cct8	14698	14950.3	15099.3
Endogenous	Cdv3	NM_175833.2									9218	9075	8834	Cdv3	12733.6	12768.1	12999.5
Endogenous	Cecr2	NM_001128151.1									776	750	729	Cecr2	1071.96	1055.22	1072.74
Endogenous	Cep152	NM_001081091.1									488	499	571	Cep152	674.117	702.07	840.242
Endogenous	Chchd1	NM_025366.2									1825	1920	1825	Chchd1	2521.03	2701.35	2685.54
Endogenous	Cnbp	NM_001109746.1									157	155	145	Cnbp	216.878	218.078	213.371
Endogenous	Crem	NM_001110853.1									96	77	100	Crem	132.613	108.335	147.153
Endogenous	Crls1	NM_025646.3									1826	1730	1665	Crls1	2522.41	2434.03	2450.09
Endogenous	Csnk1d	NM_139059.2									1719	1635	1617	Csnk1d	2374.6	2300.37	2379.46
Endogenous	Cyb5r1	NM_028057.2									1843	1714	1719	Cyb5r1	2545.9	2411.52	2529.55
Endogenous	D10Ertd641e	NM_025514.2									395	394	369	D10Ertd641e	545.648	554.34	542.993
Endogenous	Dclre1c	NM_146114.3									96	88	68	Dclre1c	132.613	123.812	100.064
Endogenous	Dedd2	NM_207677.3									420	428	368	Dedd2	580.183	602.176	541.522
Endogenous	Diap2	NM_172493.1									482	503	484	Diap2	665.829	707.698	712.219
Endogenous	Dnajc24	NM_026992.2									43	44	33	Dnajc24	59.3997	61.906	48.5604
Endogenous	Dppa4	NM_001018002.1									5226	5182	4797	Dppa4	7219.13	7290.84	7058.91
Endogenous	E130308A19Rik	NM_001015681.1									865	916	852	E130308A19Rik	1194.9	1288.77	1253.74
Endogenous	Eif2ak3	NM_010121.2									496	456	449	Eif2ak3	685.168	641.571	660.715
Endogenous	Eif5a	NM_181582.3									20614	20302	19356	Eif5a	28475.9	28564	28482.9
Endogenous	Emp1	NM_010128.4									353	325	327	Emp1	487.63	457.26	481.189
Endogenous	Epdr1	NM_134065.3									376	369	340	Epdr1	519.402	519.166	500.319
Endogenous	F2r	NM_010169.2									449	481	465	F2r	620.243	676.745	684.26
Endogenous	Fam18b	NM_026210.4									1565	1488	1436	Fam18b	2161.87	2093.55	2113.11
Endogenous	Fth1	NM_010239.1									31745	32167	30577	Fth1	43852.1	45257.5	44994.9
Endogenous	Gcdh	NM_008097.2									1655	1663	1534	Gcdh	2286.2	2339.76	2257.32
Endogenous	Gdpd1	NM_025638.1									175	158	176	Gdpd1	241.743	222.299	258.989
Endogenous	Gm1564	NM_001127576.1									475	502	490	Gm1564	656.159	706.291	721.048
Endogenous	Gpr160	NM_001134386.1									191	176	145	Gpr160	263.845	247.624	213.371
Endogenous	Gprc5c	NM_001110337.1									77	73	74	Gprc5c	106.367	102.708	108.893
Endogenous	hHOTAIR-1a	hHOTAIR_1.1									13	18	12	hHOTAIR-1a	17.958	25.3252	17.6583
Endogenous	hHOTAIR-1b	hHOTAIR_1.1									50	70	63	hHOTAIR-1b	69.0694	98.4868	92.7062
Endogenous	hHOTAIR-1c	hHOTAIR_1.1									19	10	18	hHOTAIR-1c	26.2464	14.0695	26.4875
Endogenous	Hisppd2a	NM_178795.4									171	184	175	Hisppd2a	236.217	258.88	257.517
Endogenous	Hnrpa2b1	NM_016806.2									731	695	625	Hnrpa2b1	1009.79	977.833	919.704
Endogenous	HOTAIR_1	HOTAIR_1.1									34	28	16	HOTAIR_1	46.9672	39.3947	23.5444
Endogenous	KCNQ1_1	KCNQ1_1.1									107	113	93	KCNQ1_1	147.808	158.986	136.852
Endogenous	Kdelc1	NM_023645.3									1306	1289	1271	Kdelc1	1804.09	1813.56	1870.31
Endogenous	lincP21_1	lincP21_1.1									533	552	538	lincP21_1	736.279	776.639	791.681
Endogenous	Lrfn3	NM_175478.2									302	295	289	Lrfn3	417.179	415.051	425.271
Endogenous	Map1lc3a	NM_025735.1									527	502	477	Map1lc3a	727.991	706.291	701.918
Endogenous	Mll3	NM_001081383.1									329	383	378	Mll3	454.476	538.863	556.237
Endogenous	Mtap7	NM_008635.2									646	577	598	Mtap7	892.376	811.812	879.973
Endogenous	Myo10	NM_019472.2									1702	1688	1647	Myo10	2351.12	2374.94	2423.6
Endogenous	Nanog	NM_028016.2									26738	26491	25591	Nanog	36935.5	37271.6	37657.8
Endogenous	Ncoa2	NM_008678.2									456	502	475	Ncoa2	629.913	706.291	698.975
Endogenous	Ndg2	NM_175329.3									2920	2874	2697	Ndg2	4033.65	4043.59	3968.71
Endogenous	NEAT1_1	NEAT1_1.1									32420	32765	31379	NEAT1_1	44784.6	46098.8	46175
Endogenous	NM_001003899_intron	NM_001003899_intron.1									329	326	334	NM_001003899_intron	454.476	458.667	491.49
Endogenous	NM_001009935_intron	NM_001009935_intron.1									307	341	298	NM_001009935_intron	424.086	479.771	438.515
Endogenous	NM_001018002_intron	NM_001018002_intron.1									88	99	89	NM_001018002_intron	121.562	139.288	130.966
Endogenous	NM_001035123_intron	NM_001035123_intron.1									339	347	322	NM_001035123_intron	468.29	488.213	473.832
Endogenous	NM_001161737_intron	NM_001161737_intron.1									50	38	35	NM_001161737_intron	69.0694	53.4642	51.5034
Endogenous	NM_001163478_intron	NM_001163478_intron.1									2929	2930	2819	NM_001163478_intron	4046.08	4122.38	4148.23
Endogenous	NM_008097_intron	NM_008097_intron.1									91	89	62	NM_008097_intron	125.706	125.219	91.2346
Endogenous	NM_008945_intron	NM_008945_intron.1									69	70	64	NM_008945_intron	95.3157	98.4868	94.1777
Endogenous	NM_009079_intron	NM_009079_intron.1									195	192	194	NM_009079_intron	269.371	270.135	285.476
Endogenous	NM_009279_intron	NM_009279_intron.1									53	59	70	NM_009279_intron	73.2135	83.0103	103.007
Endogenous	NM_009556_intron	NM_009556_intron.1									672	695	596	NM_009556_intron	928.292	977.833	877.03
Endogenous	NM_010239_intron	NM_010239_intron.1									89	81	65	NM_010239_intron	122.943	113.963	95.6492
Endogenous	NM_013633_intron	NM_013633_intron.1									80	69	64	NM_013633_intron	110.511	97.0798	94.1777
Endogenous	NM_016806_intron	NM_016806_intron.1									102	124	109	NM_016806_intron	140.902	174.462	160.396
Endogenous	NM_025366_intron	NM_025366_intron.1									210	208	207	NM_025366_intron	290.091	292.646	304.606
Endogenous	NM_025596_intron	NM_025596_intron.1									155	177	145	NM_025596_intron	214.115	249.031	213.371
Endogenous	NM_028057_intron	NM_028057_intron.1									497	500	499	NM_028057_intron	686.549	703.477	734.292
Endogenous	NM_175329_intron	NM_175329_intron.1									160	167	135	NM_175329_intron	221.022	234.961	198.656
Endogenous	NM_175833_intron	NM_175833_intron.1									412	402	410	NM_175833_intron	569.132	565.595	603.326
Endogenous	NM_181582_intron	NM_181582_intron.1									90	102	99	NM_181582_intron	124.325	143.509	145.681
Endogenous	Nmnat2	NM_175460.3									70	79	77	Nmnat2	96.6971	111.149	113.308
Endogenous	OTTMUSG00000010431	NM_001085539.1									2469	2570	2415	OTTMUSG00000010431	3410.65	3615.87	3553.74
Endogenous	Ovol2	NM_152947.2									254	274	271	Ovol2	350.872	385.505	398.784
Endogenous	Paip1	NM_001079849.1									32	33	39	Paip1	44.2044	46.4295	57.3895
Endogenous	Peci	NM_001110331.1									978	1000	986	Peci	1351	1406.95	1450.93
Endogenous	Pfkfb1	NM_008824.2									416	393	423	Pfkfb1	574.657	552.933	622.456
Endogenous	Pou5f1	NM_013633.2									37079	37069	35266	Pou5f1	51220.5	52154.4	51894.9
Endogenous	Prg4	NM_021400.3									29	26	17	Prg4	40.0602	36.5808	25.0159
Endogenous	Prkag2	NM_145401.1									47	35	37	Prkag2	64.9252	49.2434	54.4465
Endogenous	Prss36	NM_001081374.1									155	142	158	Prss36	214.115	199.787	232.501
Endogenous	Psmb4	NM_008945.2									11012	10908	10337	Psmb4	15211.8	15347.1	15211.2
Endogenous	Ptplad2	NM_025760.3									117	95	101	Ptplad2	161.622	133.661	148.624
Endogenous	Rab3gap1	NM_178690.4									764	794	741	Rab3gap1	1055.38	1117.12	1090.4
Endogenous	Rab7l1	NM_144875.1									472	494	493	Rab7l1	652.015	695.035	725.463
Endogenous	Rabggtb-2	NM_001163478.1									6000	5990	5780	Rabggtb-2	8288.32	8427.65	8505.42
Endogenous	Rabggtb-3	NM_001163479.1									4261	4254	4102	Rabggtb-3	5886.09	5985.18	6036.2
Endogenous	Ralgps2	NM_001159965.1									186	183	188	Ralgps2	256.938	257.473	276.647
Endogenous	Rnase4	NM_021472.3									108	141	130	Rnase4	149.19	198.381	191.298
Endogenous	Ror2	NM_013846.3									326	320	379	Ror2	450.332	450.225	557.709
Endogenous	Rtn3	NM_001003933.1									988	971	982	Rtn3	1364.81	1366.15	1445.04
Endogenous	Rusc2	NM_001037709.1									158	143	125	Rusc2	218.259	201.194	183.941
Endogenous	Setd6	NM_001035123.3									1007	1025	960	Setd6	1391.06	1442.13	1412.67
Endogenous	Siva1	NM_001161737.1									5970	5741	5577	Siva1	8246.88	8077.32	8206.7
Endogenous	Slc25a10	NM_013770.1									220	207	222	Slc25a10	303.905	291.239	326.679
Endogenous	Slc30a9	NM_178651.3									356	413	392	Slc30a9	491.774	581.072	576.838
Endogenous	Slmap	NM_032008.3									2897	2870	2716	Slmap	4001.88	4037.96	3996.67
Endogenous	Ssr4	NM_009279.2									3466	3480	3322	Ssr4	4787.89	4896.2	4888.41
Endogenous	St6galnac4	NM_011373.2									42	42	39	St6galnac4	58.0183	59.0921	57.3895
Endogenous	Stxbp3b	NM_001030317.2									336	293	311	Stxbp3b	464.146	412.238	457.645
Endogenous	Tardbp	NM_001003899.2									1061	1169	1085	Tardbp	1465.65	1644.73	1596.61
Endogenous	Tmem205	NM_178577.4									146	132	123	Tmem205	201.683	185.718	180.998
Endogenous	Tmem51	NM_145402.3									1252	1207	1167	Tmem51	1729.5	1698.19	1717.27
Endogenous	Tnfrsf12a	NM_001161746.1									1119	1129	1093	Tnfrsf12a	1545.77	1588.45	1608.38
Endogenous	TSIX_1	TSIX_1.1									203	195	213	TSIX_1	280.422	274.356	313.435
Endogenous	Txnip	NM_001009935.2									4418	4419	4136	Txnip	6102.97	6217.33	6086.23
Endogenous	Vangl1	NM_177545.4									894	878	813	Vangl1	1234.96	1235.31	1196.35
Endogenous	Vezt	NM_172538.4									519	523	495	Vezt	716.94	735.837	728.406
Endogenous	XIST_1	XIST_1.1									23	20	23	XIST_1	31.7719	28.1391	33.8451
Endogenous	Zc3h10	NM_134003.1									495	459	419	Zc3h10	683.787	645.792	616.57
Endogenous	Zfp42	NM_009556.3									23869	23595	22954	Zfp42	32972.3	33197.1	33777.4
Endogenous	Zyg11bl	NM_178694.3									212	250	206	Zyg11bl	292.854	351.738	303.134
